# Supplementary material
Source: PubMed Central journal article supplement (PMC7965738)
Supplement: 3679_materials.pdf [file 3679_materials.pdf]

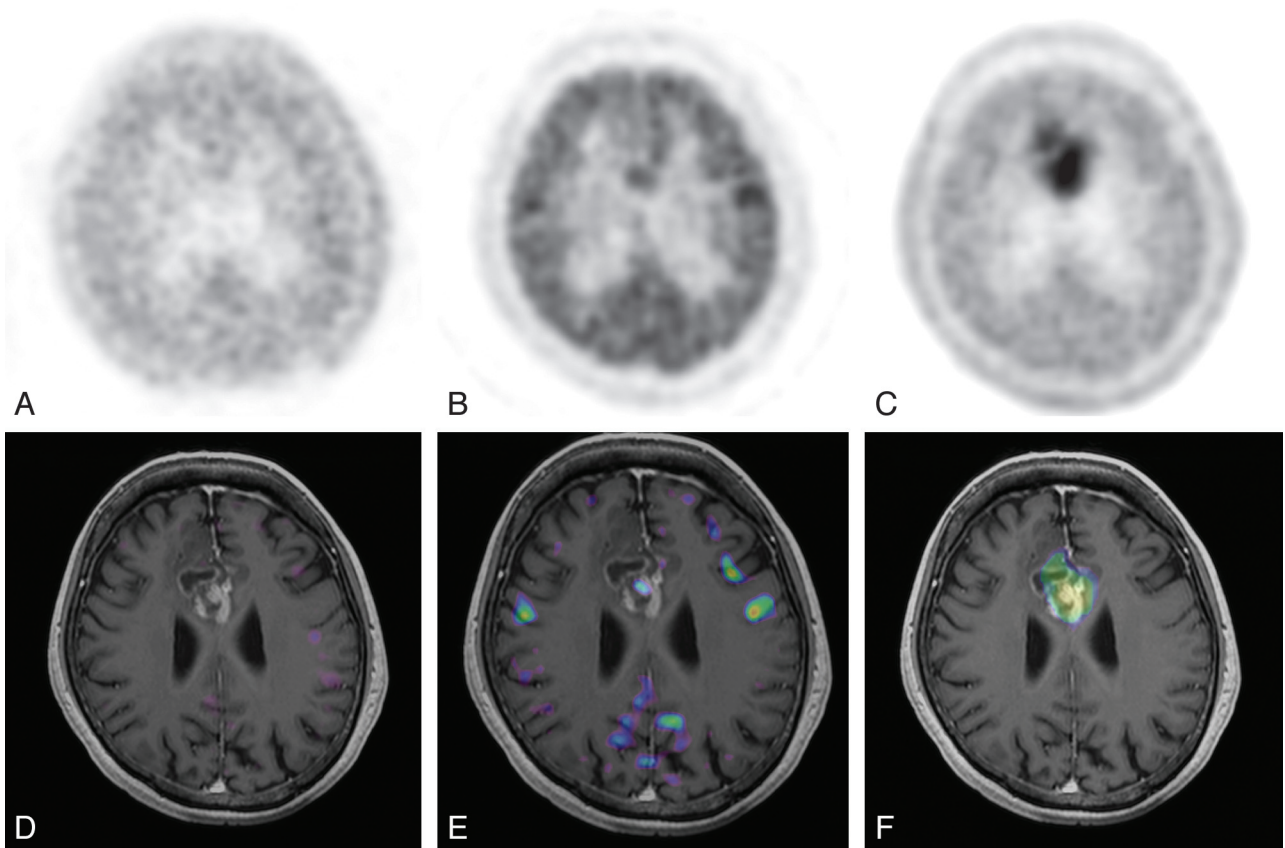

**ON-LINE FIG.** A 66-year-old woman with anaplastic oligodendroglioma in the anterior cingulate gyrus (Case 2). PET images of  $^{62}\text{Cu}$ -ATSM (A), FDG (B), and MET (C).  $^{62}\text{Cu}$ -ATSM-PET/MR fusion image showing no hypoxic region (D), FDG-PET/MR fusion image showing a very small active volume (E), and MET-PET/MR fusion image (F) showing the extensive uptake region.

**On-Line Table 1: Clinical characteristics**

| Patient No. | Age (y), Sex | Histologic Diagnosis and Grading <sup>a</sup> | Tumor Diagnosis | Intervals from MRI (days) |     |     |
|-------------|--------------|-----------------------------------------------|-----------------|---------------------------|-----|-----|
|             |              |                                               |                 | <sup>62</sup> Cu-ATSM     | FDG | MET |
| 1           | 23, F        | OA, grade II                                  | New             | 14                        | 11  | 4   |
| 2           | 66, F        | AOD, grade III                                | New             | 6                         | 2   | 3   |
| 3           | 30, F        | AOA, grade III                                | Rec             | 5                         | 2   | 8   |
| 4           | 42, F        | OA, grade II                                  | Rec             | 3                         | 3   | 9   |
| 5           | 60, M        | AOD, grade III                                | Rec             | 2                         | 3   | 6   |
| 6           | 53, M        | DA, grade II                                  | Rec             | 6                         | 8   | 9   |
| 7           | 66, F        | AOD, grade III                                | New             | 8                         | 5   | 9   |
| 8           | 75, F        | GBM, grade IV                                 | New             | 6                         | 2   | —   |
| 9           | 61, F        | GBM, grade IV                                 | New             | 12                        | 3   | —   |
| 10          | 28, F        | GBM, grade IV                                 | New             | 1                         | 2   | 7   |
| 11          | 19, M        | OA, grade II                                  | New             | 8                         | 12  | 1   |
| 12          | 73, F        | DA, grade II                                  | New             | 9                         | 4   | 2   |
| 13          | 47, M        | OD, grade II                                  | New             | 11                        | 7   | 3   |
| 14          | 60, F        | GBM, grade IV                                 | New             | 1                         | 1   | 0   |
| 15          | 43, F        | OD, grade II                                  | New             | 9                         | 7   | 2   |
| 16          | 77, M        | GBM, grade IV                                 | New             | 3                         | 8   | 6   |
| 17          | 38, M        | DA, grade II                                  | New             | 2                         | 1   | 4   |
| 18          | 62, F        | AOD, grade III                                | New             | 2                         | 3   | 9   |
| 19          | 63, M        | GBM, grade IV                                 | New             | 0                         | 1   | —   |
| 20          | 59, M        | GBM, grade IV                                 | New             | 2                         | 1   | 4   |
| 21          | 59, F        | GBM, grade IV                                 | New             | 11                        | 7   | 13  |
| 22          | 81, M        | GBM, grade IV                                 | New             | 1                         | 2   | 4   |
| 23          | 61, M        | GBM, grade IV                                 | New             | 3                         | 4   | —   |

**Note:**—AOA indicates anaplastic oligoastrocytoma; AOD, anaplastic oligodendroglioma; DA, diffuse astrocytoma; F, female; M, male; New, newly diagnosed; OA, oligoastrocytoma; OD, oligodendroglioma; Rec, recurrent.

<sup>a</sup>Histologic diagnosis and grading according to the 2007 World Health Organization classification.

**On-Line Table 2: Summary of semiquantitative values for <sup>62</sup>Cu-ATSM-PET, FDG-PET, and MET-PET**

| Patient No. | Tumor Classification | <sup>62</sup> Cu-ATSM |           | FDG                |           | MET                |           |
|-------------|----------------------|-----------------------|-----------|--------------------|-----------|--------------------|-----------|
|             |                      | SUV <sub>max</sub>    | T/B Ratio | SUV <sub>max</sub> | T/B Ratio | SUV <sub>max</sub> | T/B Ratio |
| 1           | Non-GBM              | 0.4                   | 1.0       | 9.1                | 3.0       | 4.8                | 2.6       |
| 2           | Non-GBM              | 1.0                   | 1.6       | 6.8                | 3.6       | 4.5                | 2.8       |
| 3           | Non-GBM              | 0.5                   | 0.7       | 8.2                | 2.0       | 1.7                | 1.9       |
| 4           | Non-GBM              | 0.7                   | 1.3       | 4.2                | 1.1       | 4.1                | 3.9       |
| 5           | Non-GBM              | 1.0                   | 1.5       | 6.8                | 2.5       | 4.9                | 3.7       |
| 6           | Non-GBM              | 0.6                   | 0.7       | 4.6                | 2.1       | 1.0                | 1.1       |
| 7           | Non-GBM              | 0.7                   | 2.3       | 4.1                | 1.9       | 5.1                | 2.8       |
| 8           | GBM                  | 1.2                   | 3.0       | 7.1                | 3.2       | —                  | —         |
| 9           | GBM                  | 4.3                   | 9.7       | 14.3               | 6.5       | —                  | —         |
| 10          | GBM                  | 1.2                   | 2.0       | 8.5                | 3.7       | 4.8                | 3.5       |
| 11          | Non-GBM              | 1.4                   | 1.4       | 1.8                | 0.7       | 1.3                | 0.9       |
| 12          | Non-GBM              | 1.0                   | 1.5       | 4.0                | 2.0       | 3.0                | 2.0       |
| 13          | Non-GBM              | 0.8                   | 1.6       | 5.2                | 2.3       | 1.4                | 1.3       |
| 14          | GBM                  | 1.2                   | 1.5       | 4.3                | 1.5       | 5.3                | 3.0       |
| 15          | Non-GBM              | 0.8                   | 0.9       | 3.8                | 1.2       | 1.8                | 1.4       |
| 16          | GBM                  | 1.5                   | 1.9       | 7.1                | 3.2       | 5.0                | 4.6       |
| 17          | Non-GBM              | 1.6                   | 2.3       | 6.7                | 3.9       | 3.1                | 2.0       |
| 18          | Non-GBM              | 2.3                   | 2.3       | 9.1                | 5.4       | 5.6                | 3.1       |
| 19          | GBM                  | 1.6                   | 2.7       | 4.2                | 2.2       | —                  | —         |
| 20          | GBM                  | 1.2                   | 2.4       | 6.5                | 1.7       | 4.6                | 2.6       |
| 21          | GBM                  | 1.7                   | 2.0       | 11.0               | 2.0       | 7.4                | 3.9       |
| 22          | GBM                  | 1.4                   | 2.8       | 5.1                | 1.2       | 4.3                | 3.6       |
| 23          | GBM                  | 1.5                   | 3.0       | 5.0                | 1.9       | —                  | —         |

**On-Line Table 3: Summary of volumetric values for MRI, <sup>62</sup>Cu-ATSM-PET, FDG-PET, and MET-PET in GBM**

| Patient No. | MRI (cm <sup>3</sup> ) |                  | Metabolic Active Volume (cm <sup>3</sup> ) |                  |                  |
|-------------|------------------------|------------------|--------------------------------------------|------------------|------------------|
|             | TV <sup>a</sup>        | CEV <sup>b</sup> | <sup>62</sup> Cu-ATSM <sup>c</sup>         | FDG <sup>d</sup> | MET <sup>e</sup> |
| 8           | 23.5                   | 13.3             | 1.6                                        | 1.7              | —                |
| 9           | 94.0                   | 52.4             | 46.8                                       | 33.9             | —                |
| 10          | 19.5                   | 11.5             | 0.9                                        | 10.1             | 24.9             |
| 14          | 20.6                   | 8.0              | 0                                          | 0.9              | 28.1             |
| 16          | 25.8                   | 14.8             | 4.0                                        | 16.4             | 27.8             |
| 19          | 29.9                   | 5.8              | 2.6                                        | 1.6              | —                |
| 20          | 61.3                   | 31.6             | 5.3                                        | 29.8             | 27.0             |
| 21          | 79.6                   | 30.9             | 11.8                                       | 4.6              | 73.1             |
| 22          | 57.9                   | 19.4             | 4.5                                        | 7.9              | 47.1             |
| 23          | 42.2                   | 28.4             | 4.1                                        | 2.9              | —                |

**Note:**—CEV indicates contrast-enhanced volume; TV, tumor volume.

<sup>a</sup> TV is tumor volume as a completely covered contrast-enhanced region with necrotic and cystic components.

<sup>b</sup> CEV is contrast-enhanced volume as a contrast-enhanced region without necrotic and cystic components.

<sup>c</sup> <sup>62</sup> Cu-ATSM—active volume (cm<sup>3</sup>) was extracted on the basis of a T/B cutoff threshold  $\geq 1.8$ .

<sup>d</sup> The FDG-active volume (cm<sup>3</sup>) was extracted on the basis of a T/B cutoff threshold  $\geq 1.5$ .

<sup>e</sup> The MET-active volume (cm<sup>3</sup>) was extracted on the basis of a T/B cutoff threshold  $\geq 1.3$ .
